# Supplementary material for: Improving the Detection of Epidemic Clones in Candida parapsilosis Outbreaks by Combining MALDI-TOF Mass Spectrometry and Deep Learning Approaches
Source: MDPI journal article supplement (doi:10.3390/microorganisms11041071), 2023-04-20
Supplement: s1 [file s1]

**Table S1:** Origin and characteristics of the 96 isolates used for this study.

| CODE | CLONALITY | SUSCEPTIBILITY | Origin | ISOLATION DATE | PUBLISHED IN  | allelic profile (3A-3A; 3B-3B; 3C-3C; 6A-6A; 6B-6B; 6C-6C) |
|------|-----------|----------------|--------|----------------|---------------|------------------------------------------------------------|
| 101  |           | 0,75           | PSL    | oct-18         | FEKKAR et al. | (28-35 ; 31-36 ; 44-45 ; 13-17 ; 7-7 ; 7-7)                |
| 102  | clone set | >256           | PSL    | oct-18         | FEKKAR et al. | (28-28 ; 49-82 ; 48-51 ; 8-8 ; 7-7 ; 7-7)                  |
| 103  |           | 0,19           | PSL    | oct-18         | FEKKAR et al. | (28-28 ; 33-36 ; 32-37 ; 12-12 ; 7-7 ; 7-7)                |
| 104  |           | 1              | PSL    | oct-18         | FEKKAR et al. | (27-28 ; 46-47 ; 38-39 ; 8-8 ; 7-7 ; 7-7)                  |
| 105  |           | 0,38           | PSL    | oct-18         | FEKKAR et al. | (27-28 ; 31-31 ; 34-34 ; 12-12 ; 7-7 ; 7-7)                |
| 106  | clone set | >256           | PSL    | oct-18         | FEKKAR et al. | (28-28 ; 49-82 ; 48-51 ; 8-8 ; 7-7 ; 7-7)                  |
| 107  | clone set | >256           | PSL    | oct-18         | FEKKAR et al. | (28-28 ; 49-82 ; 48-51 ; 8-8 ; 7-7 ; 7-7)                  |
| 108  |           | 0,38           | PSL    | nov-18         | FEKKAR et al. | (28-35 ; 31-36 ; 44-45 ; 13-17 ; 7-7 ; 7-7)                |
| 109  |           | 0,75           | PSL    | nov-18         | FEKKAR et al. | (28-29 ; 45-46 ; 46-46 ; 8-8 ; 7-7 ; 7-7)                  |
| 110  |           | 1,5            | PSL    | nov-18         | FEKKAR et al. | (21-35 ; 30-31 ; 36-37 ; 13-13 ; 9-9 ; 7-7)                |
| 112  |           | 0,19           | PSL    | nov-18         | FEKKAR et al. | (22-29 ; 52-52 ; 36-56 ; 12-13 ; 7-7 ; 7-7)                |
| 116  |           | 0,19           | PSL    | nov-18         | FEKKAR et al. | (28-29 ; 44-47 ; 39-39 ; 13-17 ; 7-7 ; 7-7)                |
| 117  |           | 0,5            | PSL    | nov-18         | FEKKAR et al. | (28-28 ; 42-49 ; 30-39 ; 8-13 ; 7-7 ; 7-7)                 |
| 118  |           | 1,5            | PSL    | nov-18         | FEKKAR et al. | (29-29 ; 52-52 ; 44-51 ; 12-12 ; 7-7 ; 7-7)                |
| 119  |           | >256           | PSL    | déc-18         | FEKKAR et al. | (28-30 ; 59-63 ; 43-43 ; 12-12 ; 7-7 ; 7-7)                |
| 121  |           | 0,75           | PSL    | déc-18         | FEKKAR et al. | (28-29 ; 36-47 ; 39-39 ; 13-17 ; 7-7 ; 7-7)                |
| 123  |           | 1              | PSL    | déc-18         | FEKKAR et al. | (28-28 ; 46-46 ; 39-46 ; 8-8 ; 7-7 ; 7-7)                  |
| 124  |           | 1,5            | PSL    | déc-18         | FEKKAR et al. | (28-29 ; 38-43 ; 42-47 ; 10-13 ; 7-7 ; 7-7)                |
| 126  | clone set | >256           | PSL    | déc-18         | FEKKAR et al. | (28-28 ; 49-82 ; 48-51 ; 8-8 ; 7-7 ; 7-7)                  |
| 127  |           | 0,75           | PSL    | janv-19        | FEKKAR et al. | (24-28 ; 47-52 ; 39-39 ; 8-8 ; 7-7 ; 7-7)                  |
| 128  |           | 1              | PSL    | janv-19        | FEKKAR et al. | (21-35 ; 31-31 ; 37-37 ; 13-13 ; 7-9 ; 7-7)                |
| 129  |           | 1              | PSL    | janv-19        | FEKKAR et al. | (27-28 ; 69-69 ; 40-46 ; 8-8 ; 7-7 ; 7-7)                  |
| 130  |           | 0,5            | PSL    | janv-19        | FEKKAR et al. | (29-29 ; 20-32 ; 31-31 ; 12-12 ; 10-12 ; 7-7)              |
| 131  |           | 0,25           | PSL    | janv-19        | FEKKAR et al. | (17-28 ; 32-36 ; 43-43 ; 12-12 ; 7-7 ; 7-7)                |
| 133  |           | 0,25           | PSL    | janv-19        | FEKKAR et al. | (17-28 ; 32-36 ; 42-52 ; 12-12 ; 7-7 ; 7-7)                |
| 134  |           | 1              | PSL    | janv-19        | FEKKAR et al. | (28-29 ; 33-33 ; 36-38 ; 12-12 ; 10-12 ; 7-7)              |
| 135  |           | 1,5            | PSL    | janv-19        | FEKKAR et al. | (27-29 ; 36-47 ; 39-39 ; 13-17 ; 7-7 ; 7-7)                |
| 138  |           | 1,5            | PSL    | janv-19        | FEKKAR et al. | (25-28 ; 48-48 ; 39-39 ; 8-8 ; 7-7 ; 7-7)                  |
| 139  |           | 1              | PSL    | févr-19        | FEKKAR et al. | (28-29 ; 55-55 ; 53-57 ; 8-8 ; 7-7 ; 7-7)                  |
| 143  |           | 0,5            | PSL    | févr-19        | FEKKAR et al. | (27-27 ; 47-47 ; 39-39 ; 8-8 ; 7-7 ; 7-7)                  |
| 146  |           | 0,75           | PSL    | févr-19        | FEKKAR et al. | (28-28 ; 55-55 ; 53-53 ; 8-8 ; 7-7 ; 7-7)                  |
| 147  |           | 0,75           | PSL    | févr-19        | FEKKAR et al. | (28-29 ; 36-36 ; 39-39 ; 17-17 ; 7-7 ; 7-7)                |
| 148  |           | 0,5            | PSL    | mars-19        | FEKKAR et al. | (28-28 ; 47-47 ; 39-39 ; 7-8 ; 7-7 ; 7-7)                  |
| 149  |           | 1              | PSL    | mars-19        | FEKKAR et al. | (27-29 ; 36-47 ; 38-38 ; 17-17 ; 7-7 ; 7-7)                |
| 150  |           | 1,5            | PSL    | mars-19        | FEKKAR et al. | (28-28 ; 36-36 ; 47-47 ; 13-14 ; 9-9 ; 7-7)                |
| 151  | clone set | >256           | PSL    | mars-19        | FEKKAR et al. | (28-28 ; 49-82 ; 48-51 ; 8-8 ; 7-7 ; 7-7)                  |
| 152  |           | 0,5            | PSL    | mars-19        | FEKKAR et al. | (28-28 ; 47-47 ; 38-38 ; 7-7 ; 7-7 ; 7-7)                  |
| 153  |           | 0,5            | PSL    | avr-19         | FEKKAR et al. | (28-28 ; 30-30 ; 33-33 ; 12-12 ; 9-9 ; 8-8)                |
| 154  |           | 0,25           | PSL    | avr-19         | FEKKAR et al. | (28-28 ; 46-48 ; 39-39 ; 8-8 ; 7-7 ; 7-7)                  |
| 155  |           | 0,5            | PSL    | avr-19         | FEKKAR et al. | (29-29 ; 20-32 ; 31-36 ; 12-12 ; 10-12 ; 7-7)              |
| 156  |           | 1              | PSL    | avr-19         | FEKKAR et al. | (22-29 ; 52-52 ; 38-55 ; 12-13 ; 7-7 ; 7-7)                |
| 157  |           | 1              | PSL    | mai-19         | FEKKAR et al. | (28-28 ; 32-32 ; 39-46 ; 13-13 ; 7-10 ; 7-7)               |
| 158  |           | 0,25           | PSL    | mai-19         | FEKKAR et al. | (28-28 ; 36-36 ; 40-40 ; 13-17 ; 7-7 ; 7-7)                |
| 162  |           | 1,75           | PSL    | juin-19        | FEKKAR et al. | (28-28 ; 47-47 ; 39-39 ; 13-17 ; 7-7 ; 7-7)                |
| 172  |           | 24             | PSL    | juil-19        | FEKKAR et al. | (28-28 ; 45-45 ; 46-46 ; 8-8 ; 7-7 ; 7-7)                  |
| 177  |           | 3              | PSL    | juil-19        | FEKKAR et al. | (22-27 ; 52-62 ; 38-49 ; 12-12 ; 7-13 ; 7-7)               |
| 201  | clone set | >256           | PSL    | août-19        | FEKKAR et al. | (28-28 ; 49-82 ; 48-51 ; 8-8 ; 7-7 ; 7-7)                  |
| 208  |           | 0,25           | PSL    | août-19        | FEKKAR et al. | (27-29 ; 31-31 ; 36-36 ; 12-12 ; 7-7 ; 7-7)                |
| 209  |           | 0,25           | PSL    | août-19        | FEKKAR et al. | (28-28 ; 49-56 ; 37-37 ; 12-12 ; 7-7 ; 7-7)                |
| 211  | clone set | >256           | PSL    | sept-19        | FEKKAR et al. | (28-28 ; 49-82 ; 48-51 ; 8-8 ; 7-7 ; 7-7)                  |
| 214  |           | 0,75           | PSL    | sept-19        | FEKKAR et al. | (22-29 ; 52-52 ; 36-36 ; 12-12 ; 7-7 ; 7-7)                |
| 220  |           | 1              | PSL    | sept-19        | FEKKAR et al. | (29-29 ; 52-52 ; 44-51 ; 12-12 ; 7-7 ; 7-7)                |
| 225  | clone set | >256           | PSL    | oct-19         | FEKKAR et al. | (28-28 ; 49-82 ; 48-51 ; 8-8 ; 7-7 ; 7-7)                  |
| 227  |           | 0,38           | PSL    | oct-19         | FEKKAR et al. | (27-28 ; 31-31 ; 33-42 ; 11-12 ; 7-7 ; 7-7)                |
| 228  |           | 48             | PSL    | oct-19         | FEKKAR et al. | (29-30 ; 52-52 ; 44-51 ; 12-32 ; 7-7 ; 7-7)                |
| 257  | clone set | >256           | PSL    | févr-20        | unpublished   | (28-28 ; 49-75 ; 48-51 ; 8-8 ; 7-7 ; 7-7)                  |
| 259  | clone set | >256           | PSL    | févr-20        | unpublished   | (28-28 ; 49-82 ; 48-51 ; 8-8 ; 7-7 ; 7-7)                  |
| 261  | clone set | >256           | PSL    | févr-20        | unpublished   | (28-28 ; 49-82 ; 48-51 ; 8-8 ; 7-7 ; 7-7)                  |
| 274  | clone set | >256           | PSL    | avr-20         | unpublished   | (28-28 ; 49-82 ; 48-51 ; 8-8 ; 7-7 ; 7-7)                  |
| 280  | clone set | >256           | PSL    | avr-20         | unpublished   | (28-28 ; 49-75 ; 48-51 ; 8-8 ; 7-7 ; 7-7)                  |
| 281  |           | 0,125          | PSL    | avr-20         | FEKKAR et al. | (28-28 ; 62-62 ; 49-49 ; 12-14 ; 7-14 ; 7-7)               |
| 303  | clone set | >256           | PSL    | avr-20         | unpublished   | (28-28 ; 49-82 ; 48-51 ; 8-8 ; 7-7 ; 7-7)                  |
| 304  | clone set | >256           | PSL    | avr-20         | unpublished   | (28-28 ; 49-82 ; 48-51 ; 8-8 ; 7-7 ; 7-7)                  |
| 306  |           | 128            | PSL    | mai-20         | unpublished   | (29-29 ; 36-47 ; 39-39 ; 13-17 ; 7-7 ; 7-7)                |
| 307  | clone set | >256           | PSL    | avr-20         | unpublished   | (28-28 ; 49-76 ; 48-51 ; 8-8 ; 7-7 ; 7-7)                  |
| 312  | clone set | >256           | PSL    | mai-20         | unpublished   | (28-28 ; 49-75 ; 48-51 ; 8-8 ; 7-7 ; 7-7)                  |
| 322  | clone set | >256           | PSL    | juin-20        | unpublished   | (28-28 ; 49-75 ; 48-51 ; 8-8 ; 7-7 ; 7-7)                  |
| 324  | clone set | >256           | PSL    | juin-20        | unpublished   | (28-28 ; 49-82 ; 48-51 ; 8-8 ; 7-7 ; 7-7)                  |
| 329  | clone set | 16             | PSL    | juil-20        | unpublished   | (28-28 ; 46-82 ; 48-51 ; 8-8 ; 7-7 ; 7-7)                  |
| 330  |           | 4              | PSL    | juil-20        | unpublished   | (18-29 ; 31-51 ; 14-48 ; 7-9 ; 7-9 ; 7-7)                  |
| 337  |           | >256           | PSL    | juil-20        | unpublished   | (28-29 ; 28-28 ; 50-50 ; 13-33 ; 7-7 ; 7-7)                |
| 339  |           | 96             | PSL    | juil-20        | unpublished   | (28-29 ; 32-45 ; 35-40 ; 12-32 ; 12-12 ; 7-7)              |
| 344  | clone set | >256           | PSL    | août-20        | unpublished   | (28-28 ; 49-82 ; 48-51 ; 8-8 ; 7-7 ; 7-7)                  |
| 349  | clone set | >256           | PSL    | août-20        | unpublished   | (28-28 ; 49-82 ; 48-51 ; 8-8 ; 7-7 ; 7-7)                  |

|         |           |      |          |         |                 |                                               |
|---------|-----------|------|----------|---------|-----------------|-----------------------------------------------|
| 350     | clone set | >256 | PSL      | août-20 | unpublished     | (28-28 ; 49-82 ; 48-51 ; 8-8 ; 7-7 ; 7-7)     |
| 360     | clone set | >256 | PSL      | oct-20  | unpublished     | (28-28 ; 49-82 ; 48-51 ; 8-8 ; 7-7 ; 7-7)     |
| 361     | clone set | >256 | PSL      | oct-20  | unpublished     | (28-28 ; 49-82 ; 48-51 ; 8-8 ; 7-7 ; 7-7)     |
| BCHFR1  | clone set | >256 | BCH      | mai-21  | PRESENTE et al. | (28-28 ; 49-75 ; 48-51 ; 8-8 ; 7-7 ; 7-7)     |
| BCHFR3  | clone set | >256 | BCH      | mai-21  | PRESENTE et al. | (28-28 ; 49-75 ; 48-51 ; 8-8 ; 7-7 ; 7-7)     |
| BCHFR4  | clone set | >256 | BCH      | juin-21 | PRESENTE et al. | (28-28 ; 49-75 ; 48-51 ; 8-8 ; 7-7 ; 7-7)     |
| BCHFR5  | clone set | >256 | BCH      | juin-21 | PRESENTE et al. | (28-28 ; 49-75 ; 48-51 ; 8-8 ; 7-7 ; 7-7)     |
| BCHFR6  | clone set | >256 | BCH      | juin-21 | PRESENTE et al. | (28-28 ; 49-75 ; 48-51 ; 8-8 ; 7-7 ; 7-7)     |
| BCHFR7  | clone set | >256 | BCH      | juin-21 | PRESENTE et al. | (28-28 ; 49-82 ; 48-51 ; 8-8 ; 7-7 ; 7-7)     |
| BCHFR8  | clone set | >256 | BCH      | juin-21 | PRESENTE et al. | (28-28 ; 49-75 ; 48-51 ; 8-8 ; 7-7 ; 7-7)     |
| BCHFR9  | clone set | >256 | BCH      | juin-21 | PRESENTE et al. | (28-28 ; 49-75 ; 48-51 ; 8-8 ; 7-7 ; 7-7)     |
| BDXAZA  |           | >256 | Bordeaux | nov-21  | unpublished     | (28-29 ; 21-21 ; 39-39 ; 12-12 ; 10-12 ; 7-7) |
| BDXVIL  |           | 8    | Bordeaux | nov-21  | unpublished     | (32-33 ; 31-31 ; 45-45 ; 13-13 ; 7-7 ; 7-7)   |
| PARAR10 |           | 64   | PSL      | mars-12 | FEKKAR et al.   | (28-29 ; 36-59 ; 38-39 ; 18-18 ; 7-7 ; 7-7)   |
| PARAR13 | clone set | >256 | PSL      | août-18 | FEKKAR et al.   | (28-28 ; 49-82 ; 48-51 ; 8-8 ; 7-7 ; 7-7)     |
| PARAR18 | clone set | >256 | PSL      | nov-17  | FEKKAR et al.   | (28-28 ; 49-82 ; 48-51 ; 8-8 ; 7-7 ; 7-7)     |
| PARAR19 | clone set | >256 | PSL      | oct-18  | FEKKAR et al.   | (28-28 ; 49-82 ; 48-51 ; 8-8 ; 7-7 ; 7-7)     |
| PARAR2  |           | >256 | PSL      | nov-17  | unpublished     | (28-29 ; 36-56 ; 39-39 ; 13-17 ; 7-7 ; 7-7)   |
| PARAR20 |           | 8    | PSL      | août-13 | FEKKAR et al.   | (28-32 ; 32-33 ; 39-45 ; 13-15 ; 7-7 ; 7-7)   |
| PARAR4  | clone set | >256 | PSL      | nov-17  | FEKKAR et al.   | (28-28 ; 49-82 ; 48-51 ; 8-8 ; 7-7 ; 7-7)     |
| PARAR5  | clone set | >256 | PSL      | janv-18 | FEKKAR et al.   | (28-28 ; 49-82 ; 48-51 ; 8-8 ; 7-7 ; 7-7)     |
| PARAR8  | clone set | >256 | PSL      | janv-18 | FEKKAR et al.   | (28-28 ; 49-82 ; 48-51 ; 8-8 ; 7-7 ; 7-7)     |
